# Supplementary material for: Model based on single-nucleotide polymorphism to discriminate aspirin resistance patients
Source: HighWire-hosted journal article supplement (doi:10.1136/svn-2022-002228), 2023-08-16
Supplement: svn-2022-002228supp001_data_supplement.pdf [file svn-2022-002228supp001_data_supplement.pdf]

**Supplemental materials for** “*A model based on single-nucleotide polymorphism to discriminate patients with aspirin resistance*”

## Supplemental tables

Supplemental table 1. Genetic type of ASR patients and non-ASR patients

| Genetic type            | ASR<br>n=87 | Non-ASR<br>n=125 | P value            |
|-------------------------|-------------|------------------|--------------------|
| <i>PTGS1~rs10306114</i> |             |                  | 1.000              |
| A/A                     | 87          | 125              |                    |
| <i>LTC4S~rs730012</i>   |             |                  | 0.952              |
| A/A                     | 55 (63.2%)  | 79 (63.2%)       |                    |
| A/C                     | 31 (35.6%)  | 46 (36.8%)       |                    |
| C/C                     | 1 (1.1%)    | 0 (0.0%)         |                    |
| <i>GP1BA~rs6065</i>     |             |                  | 0.008 <sup>†</sup> |
| A/A                     | 68 (78.2%)  | 114 (91.2%)      |                    |
| A/C                     | 19 (21.8%)  | 10 (8.0%)        |                    |
| C/C                     | 0 (0.0%)    | 1 (0.8%)         |                    |
| <i>TBXA2R~rs1131882</i> |             |                  | 0.008 <sup>†</sup> |
| A/A                     | 22 (25.3%)  | 50 (40.0%)       |                    |
| G/A                     | 42 (48.3%)  | 57 (45.6%)       |                    |
| G/G                     | 23 (26.4%)  | 18 (14.4%)       |                    |
| <i>TBXA2R~rs4523</i>    |             |                  | 0.013 <sup>†</sup> |
| A/A                     | 39 (44.8%)  | 76 (60.8%)       |                    |
| A/G                     | 37 (42.5%)  | 42 (33.6%)       |                    |
| G/G                     | 11 (12.6%)  | 7 (5.6%)         |                    |
| <i>PTGS2~rs12042763</i> |             |                  | 0.001 <sup>†</sup> |
| G/G                     | 38 (43.7%)  | 84 (67.2%)       |                    |
| G/T                     | 43 (49.4%)  | 35 (28.0%)       |                    |
| T/T                     | 6 (6.9%)    | 6 (4.8%)         |                    |
| <i>PTGS2~rs20417</i>    |             |                  | 0.008 <sup>†</sup> |
| C/C                     | 76 (87.4%)  | 121 (96.8%)      |                    |
| C/G                     | 11 (12.6%)  | 4 (3.2%)         |                    |

|                         |            |              |                    |
|-------------------------|------------|--------------|--------------------|
| <i>PEAR1~rs12041331</i> |            |              | 0.357              |
| G/G                     | 18 (20.7%) | 26 (20.8%)   |                    |
| G/A                     | 37 (42.5%) | 42 (33.6%)   |                    |
| A/A                     | 32 (36.8%) | 57 (45.6%)   |                    |
| <i>P2RY1~rs1065776</i>  |            |              | 0.950              |
| C/C                     | 79 (90.8%) | 113 (90.4%)  |                    |
| C/T                     | 6 (6.9%)   | 11 (8.8%)    |                    |
| T/T                     | 2 (2.3%)   | 1 (0.8%)     |                    |
| <i>NTRK1~rs2768759</i>  |            |              | 0.587              |
| A/A                     | 77 (88.5%) | 107 (85.6%)  |                    |
| A/C                     | 8 (9.2%)   | 18 (14.4%)   |                    |
| C/C                     | 2 (2.3%)   | 0 (0.0%)     |                    |
| <i>NOS3~rs1799983</i>   |            |              | 0.005 <sup>†</sup> |
| G/G                     | 55 (63.2%) | 101 (80.8%)  |                    |
| G/T                     | 26 (29.9%) | 19 (15.2%)   |                    |
| T/T                     | 6 (6.9%)   | 5 (4.0%)     |                    |
| <i>NAT2~rs4271002</i>   |            |              | 0.351              |
| G/G                     | 55 (63.2%) | 88 (70.4%)   |                    |
| G/C                     | 28 (32.2%) | 29 (23.2%)   |                    |
| C/C                     | 4 (4.6%)   | 8 (6.4%)     |                    |
| <i>ITGB3~rs5918</i>     |            |              | 0.231              |
| T/T                     | 86 (98.9%) | 125 (100.0%) |                    |
| T/C                     | 1 (1.1%)   | 0 (0.0%)     |                    |
| <i>ITGA2~rs1062535</i>  |            |              | 0.658              |
| A/A                     | 8 (9.2%)   | 11 (8.8%)    |                    |
| G/A                     | 43 (49.4%) | 67 (53.6%)   |                    |
| G/G                     | 36 (41.4%) | 47 (37.6%)   |                    |
| <i>ITGA2~rs1126643</i>  |            |              | 0.658              |
| C/C                     | 36 (41.4%) | 47 (37.6%)   |                    |
| C/T                     | 43 (49.4%) | 67 (53.6%)   |                    |

|                           |            |             |       |
|---------------------------|------------|-------------|-------|
| T/T                       | 8 (9.2%)   | 11 (8.8%)   |       |
| <i>GP6~rs1613662</i>      |            |             | 0.698 |
| A/A                       | 85 (97.7%) | 121 (96.8%) |       |
| G/A                       | 2 (2.3%)   | 4 (3.2%)    |       |
| <i>F13A1~rs5985</i>       |            |             | 0.796 |
| C/C                       | 86 (98.9%) | 124 (99.2%) |       |
| C/A                       | 1 (1.1%)   | 1 (0.8%)    |       |
| <i>CYP4F2~rs2108622</i>   |            |             | 0.493 |
| C/C                       | 39 (44.8%) | 61 (48.8%)  |       |
| C/T                       | 38 (43.7%) | 53 (42.4%)  |       |
| T/T                       | 10 (11.5%) | 11 (8.8%)   |       |
| <i>CYP2D6~rs28360521</i>  |            |             | 0.617 |
| C/C                       | 25 (28.7%) | 41 (32.8%)  |       |
| C/T                       | 41 (47.1%) | 55 (44.0%)  |       |
| T/T                       | 21 (24.1%) | 29 (23.2%)  |       |
| <i>ACE~rs4291</i>         |            |             | 0.935 |
| A/A                       | 29 (33.3%) | 46 (36.8%)  |       |
| T/A                       | 48 (55.2%) | 60 (48.0%)  |       |
| T/T                       | 10 (11.5%) | 19 (15.2%)  |       |
| <i>ACE~rs4292</i>         |            |             | 0.857 |
| T/T                       | 29 (33.3%) | 46 (36.8%)  |       |
| C/T                       | 47 (54.0%) | 60 (48.0%)  |       |
| C/C                       | 11 (12.6%) | 19 (15.2%)  |       |
| <i>COL26A1~rs10279545</i> |            |             | 0.882 |
| T/T                       | 72 (82.8%) | 102 (81.6%) |       |
| T/C                       | 12 (13.8%) | 21 (16.8%)  |       |
| C/C                       | 3 (3.4%)   | 2 (1.6%)    |       |

†, the difference was significant.

ASR, aspirin resistance.

**Supplemental table 2. Univariate logistic analysis of factors related to ASR based on the derivation cohort**

| Parameters                         | OR (95%CI)          | P value |
|------------------------------------|---------------------|---------|
| Ever-or-now smokers                | 2.00 (1.07-3.74)    | 0.030   |
| <i>GPIBA</i> (C/C vs. C/T & T/T)   | 3.72 (1.71-8.13)    | 0.001   |
| <i>TBXA2R</i>                      |                     |         |
| A/A & A/A                          | Reference           |         |
| A/A & A/G, A/A & G/G               | 1.49 (0.67-3.30)    | 0.328   |
| A/G & A/G, A/G & G/G,<br>G/G & G/G | 2.55 (1.33-4.91)    | 0.005   |
| <i>PTGS2</i>                       |                     |         |
| G/G & C/C                          | Reference           |         |
| G/G & C/G, G/T & C/C,<br>T/T & C/C | 2.94 (1.65-5.24)    | <0.001  |
| G/T & C/G, T/T & C/G               | 12.66 (1.42-112.60) | 0.023   |
| <i>NOS3</i> (G/G vs. G/T & T/T)    | 2.45 (1.31-4.57)    | 0.005   |

ASR, aspirin resistance.

**Supplemental table 3. Multivariate logistic analysis of SNP related to ASR based on the derivation cohort**

| Parameters                       | $\beta$ coefficient | $\beta$ coefficient weight <sup>§</sup> | OR (95%CI)          | P value |
|----------------------------------|---------------------|-----------------------------------------|---------------------|---------|
| <i>GPIBA</i> (C/C vs. C/T & T/T) | 0.881               | 1.65                                    | 2.41 (1.01-5.75)    | 0.047   |
| <i>TBXA2R</i>                    |                     |                                         |                     |         |
| A/A & A/A                        |                     |                                         | Reference           |         |
| A/A & A/G, A/A & G/G             | 0.534               | 1.00                                    | 1.71 (0.77-3.78)    | 0.188   |
| A/G & A/G, A/G & G/G, G/G & G/G  | 0.911               | 1.71                                    | 2.49 (1.21-5.13)    | 0.014   |
| <i>PTGS2</i>                     |                     |                                         |                     |         |
| G/G & C/C                        |                     |                                         | Reference           |         |
| G/G & C/G, G/T & C/C, T/T & C/C  | 1.374               | 2.57                                    | 3.95 (2.20-7.09)    | <0.001  |
| G/T & C/G, T/T & C/G             | 2.572               | 4.82                                    | 13.09 (1.33-128.68) | 0.027   |
| <i>NOS3</i> (G/G vs. G/T & T/T)  | 0.847               | 1.59                                    | 2.33 (1.16-4.69)    | 0.018   |

§, the weight was evaluated based on the parameter with lowest  $\beta$  coefficient.

ASR, aspirin resistance; SNP, single-nucleotide polymorphism.

**Supplemental table 4. The demographic and clinical features of patients in validation cohort, grouped by ASR and non-ASR**

| Characteristics                         | ASR<br>n=130     | Non-ASR<br>n=242 | <i>P</i> value      |
|-----------------------------------------|------------------|------------------|---------------------|
| Age, years, m (IQR)                     | 55 (49-61)       | 55 (49-63)       | 0.494               |
| Male gender, n (%)                      | 65 (50.0%)       | 112 (46.3%)      | 0.354               |
| Comorbidities, n (%)                    |                  |                  |                     |
| Hypertension                            | 45 (34.6%)       | 97 (40.1%)       | 0.301               |
| Dyslipidemia                            | 14 (10.8%)       | 21 (8.7%)        | 0.511               |
| Diabetes mellitus                       | 39 (30.0%)       | 66 (27.3%)       | 0.578               |
| CA diseases                             | 10 (7.7%)        | 21 (8.7%)        | 0.743               |
| Ischemic stroke                         | 70 (53.8%)       | 125 (51.7%)      | 0.687               |
| Ever-or-now smokers, n (%)              | 39 (30.0%)       | 94 (38.8%)       | 0.090               |
| Regular drinkers, n (%)                 | 8 (6.2%)         | 26 (10.7%)       | 0.144               |
| Laboratory findings                     |                  |                  |                     |
| Platelet count, $\times 10^9$ , m (IQR) | 216 (205-238)    | 216 (206-229)    | 0.971               |
| APTT, m (IQR)                           | 24.8 (24.1-30.4) | 24.8 (24.5-30.4) | 0.753               |
| PT, m (IQR)                             | 1 (1-1)          | 1 (1-1)          | 0.070               |
| Fbg, m (IQR)                            | 2.80 (2.34-3.15) | 2.80 (2.37-3.51) | 0.425               |
| Aneurysm locations, n (%)               |                  |                  | 0.816               |
| AcomA/ACA                               | 10 (7.7%)        | 22 (9.1%)        |                     |
| ICA                                     | 84 (64.6%)       | 147 (60.7%)      |                     |
| MCA                                     | 32 (24.6%)       | 65 (26.9%)       |                     |
| PC                                      | 4 (3.1%)         | 8 (3.3%)         |                     |
| Aneurysm size, ml, m (IQR)              | 6.3 (6.1-8.7)    | 6.3 (6.0-8.7)    | 0.558               |
| SNPs related to ASR, n (%)              |                  |                  |                     |
| <i>GP1BA</i> -rs6065 (A>C)              |                  |                  | <0.001 <sup>†</sup> |
| A/A                                     | 100 (76.9%)      | 234 (96.7%)      |                     |
| A/C                                     | 30 (23.1%)       | 6 (2.5%)         |                     |
| C/C                                     | 0 (0.0%)         | 2 (0.8%)         |                     |

|                                  |             |             |                     |
|----------------------------------|-------------|-------------|---------------------|
| <i>TBXA2R~rs1131882 (A&gt;G)</i> |             |             | 0.003 <sup>†</sup>  |
| A/A                              | 36 (27.7%)  | 94 (38.8%)  |                     |
| G/A                              | 60 (46.2%)  | 115 (47.5%) |                     |
| G/G                              | 34 (26.2%)  | 33 (13.6%)  |                     |
| <i>TBXA2R~rs4523 (A&gt;G)</i>    |             |             | 0.016 <sup>†</sup>  |
| A/A                              | 62 (47.7%)  | 143 (59.1%) |                     |
| A/G                              | 52 (40.0%)  | 85 (35.1%)  |                     |
| G/G                              | 16 (12.3%)  | 14 (5.8%)   |                     |
| <i>PTGS2~rs12042763 (G&gt;T)</i> |             |             | <0.001 <sup>†</sup> |
| G/G                              | 47 (36.2%)  | 171 (70.7%) |                     |
| G/T                              | 75 (57.7%)  | 59 (24.4%)  |                     |
| T/T                              | 8 (6.2%)    | 12 (5.0%)   |                     |
| <i>PTGS2~rs20417 (C&gt;G)</i>    |             |             | <0.001 <sup>†</sup> |
| C/C                              | 110 (84.6%) | 234 (96.7%) |                     |
| C/G                              | 20 (15.4%)  | 8 (3.3%)    |                     |
| <i>NOS3~rs1799983 (G&gt;T)</i>   |             |             | 0.300               |
| G/G                              | 99 (76.2%)  | 194 (80.2%) |                     |
| G/T                              | 25 (19.2%)  | 45 (18.6%)  |                     |
| T/T                              | 6 (4.6%)    | 3 (1.2%)    |                     |
| ASR-CN score, m (IQR)            | 4 (3-6)     | 2 (1-4)     | <0.001 <sup>†</sup> |
| CYP2C19 metabolizer, n (%)       |             |             | 0.995               |
| EM                               | 47 (36.2%)  | 91 (37.6%)  |                     |
| IM                               | 70 (53.8%)  | 122 (50.4%) |                     |
| PM                               | 13 (10.0%)  | 29 (12.0%)  |                     |

<sup>†</sup>, the difference was significant.

ASR, aspirin resistance; CA, coronary artery; APTT, activated partial thromboplastin time; PT, Prothrombin time; Fbg, fibrinogen; ACA, anterior cerebral artery; Acoma, anterior communicating artery; ICA, internal carotid artery; MCA, middle cerebral artery; PC, posterior circulation; SNP, single-nucleotide polymorphism; EM, extensive metabolizer; IM, intermediate metabolizer; PM, poor metabolizer.



**Supplemental table 5. Multivariate logistic analysis of factors related to ASR**

| Parameters   | Crude            |                | Adjusted <sup>§</sup> |                |
|--------------|------------------|----------------|-----------------------|----------------|
|              | OR (95%CI)       | <i>P</i> value | OR (95%CI)            | <i>P</i> value |
| ASR-CN score | 1.69 (1.48-1.93) | <0.001         | 1.73 (1.51-1.99)      | <0.001         |

§, the result was adjusted by age, gender, dyslipidemia, diabetes mellitus and platelet count.

ASR, aspirin resistance.

**Supplemental table 6. The ischemic events in ASR patients and non-ASR patients**

| Events, n (%)                     | ASR<br>n=130 | Non-ASR<br>n=242 | <i>P</i> value |
|-----------------------------------|--------------|------------------|----------------|
| Ischemic stroke                   | 20 (15.4%)   | 17 (7.0%)        | 0.016          |
| Stent thrombosis                  | 1 (0.8%)     | 1 (0.4%)         | 0.655          |
| Transient ischemic attack         | 1 (0.8%)     | 4 (1.7%)         | 0.481          |
| Death from cerebrovascular causes | 0 (0.0%)     | 1 (0.4%)         | 0.464          |

ASR, aspirin resistance.

**Supplemental table 7. Univariate logistic analysis of factors related to 30-day ischemic events**

| Parameters          | OR (95%CI)         | P value             |
|---------------------|--------------------|---------------------|
| Age                 | 0.99 (0.96-1.02)   | 0.558               |
| Male gender         | 1.28 (0.68-2.40)   | 0.443               |
| Hypertension        | 1.09 (0.58-2.06)   | 0.788               |
| Dyslipidemia        | 1.58 (0.62-4.05)   | 0.340               |
| Diabetes mellitus   | 1.17 (0.60-2.30)   | 0.647               |
| CA diseases         | 1.86 (0.72-4.81)   | 0.202               |
| Ischemic stroke     | 1.96 (1.02-3.79)   | 0.044 <sup>†</sup>  |
| Ever-or-now smokers | 1.23 (0.65-2.33)   | 0.527               |
| Regular drinkers    | 0.43 (0.10-1.85)   | 0.257               |
| Platelet count      | 1.00 (1.00-1.01)   | 0.482               |
| APTT                | 1.00 (0.97-1.02)   | 0.873               |
| PT                  | 0.42 (0.13-1.37)   | 0.148               |
| Fbg                 | 1.19 (0.84-1.70)   | 0.326               |
| Aneurysm locations  |                    |                     |
| AcomA/ACA           | Reference          |                     |
| ICA                 | 0.81 (0.29-2.25)   | 0.681               |
| MCA                 | 0.62 (0.20-1.97)   | 0.419               |
| PC                  | ...                | ...                 |
| Aneurysm size       | 1.06 (0.95-1.18)   | 0.315               |
| ASR (TEG-AA <50%)   | 1.94 (1.04-3.64)   | 0.039 <sup>†</sup>  |
| ASR-CN score        | 1.21 (1.05-1.40)   | 0.010               |
| CYP2C19 metabolizer |                    |                     |
| EM                  | Reference          |                     |
| IM                  | 6.20 (2.13-18.05)  | 0.001 <sup>†</sup>  |
| PM                  | 11.89 (3.55-39.83) | <0.001 <sup>†</sup> |

<sup>†</sup>, the difference was significant.

ASR, aspirin resistance; CA, coronary artery; APTT, activated partial thromboplastin time; PT, Prothrombin time; Fbg, fibrinogen; ACA, anterior cerebral artery; AcomA, anterior communicating artery; ICA, internal carotid artery; MCA, middle cerebral artery; PC, posterior circulation; EM, extensive metabolizer; IM, intermediate metabolizer; PM, poor metabolizer.

## Supplemental figures

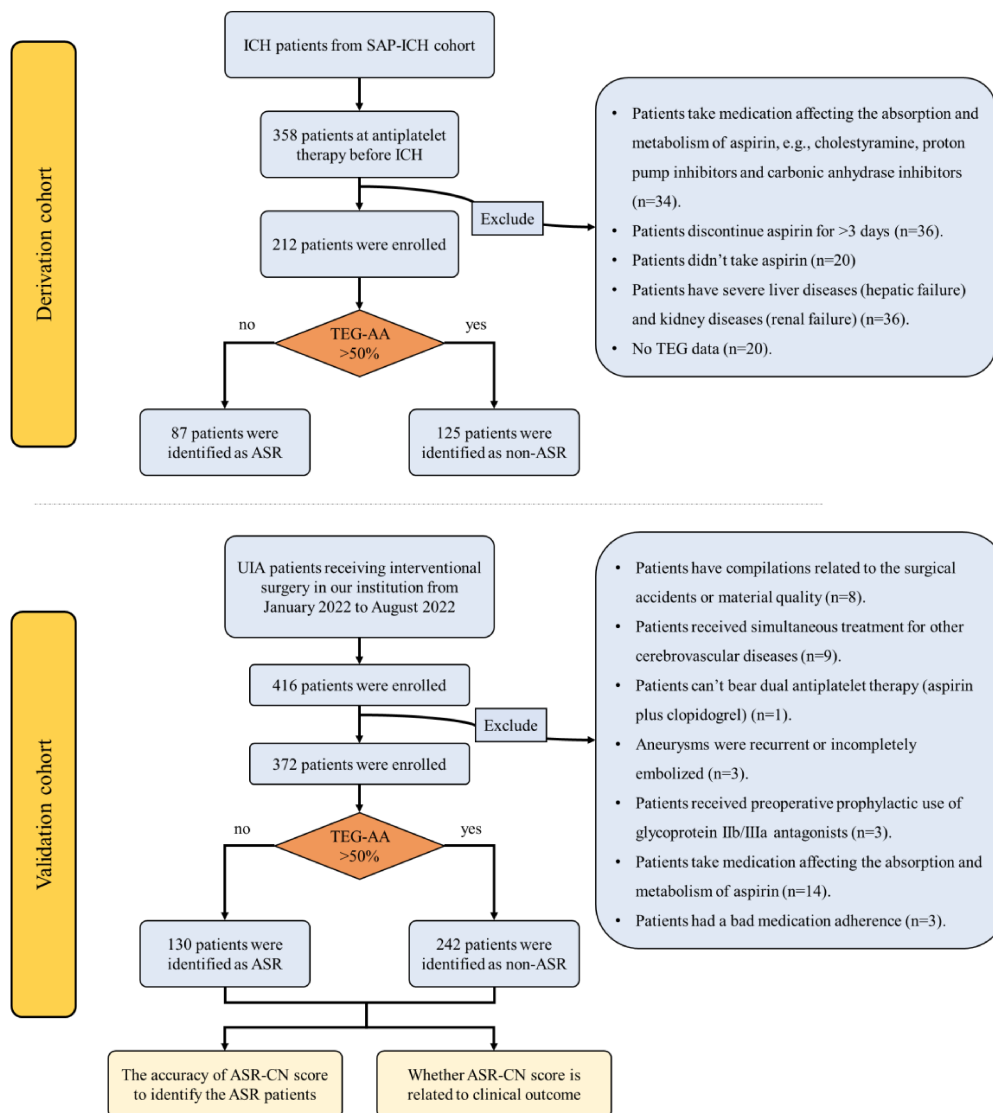

## Supplemental figure 1. Flow char of patient enrollment.

We included 212 ICH patients from SAP-ICH cohort as the derivation cohort. Among them, 87 patients were identified as the ASR (with TEG-AA <50%, at discontinuing aspirin for no more than 3 days). Moreover, we also enrolled 372 UJA patients receiving interventional surgery as the validation cohort. Among them, 130 patients were identified as the ASR (with TEG-AA <50%).

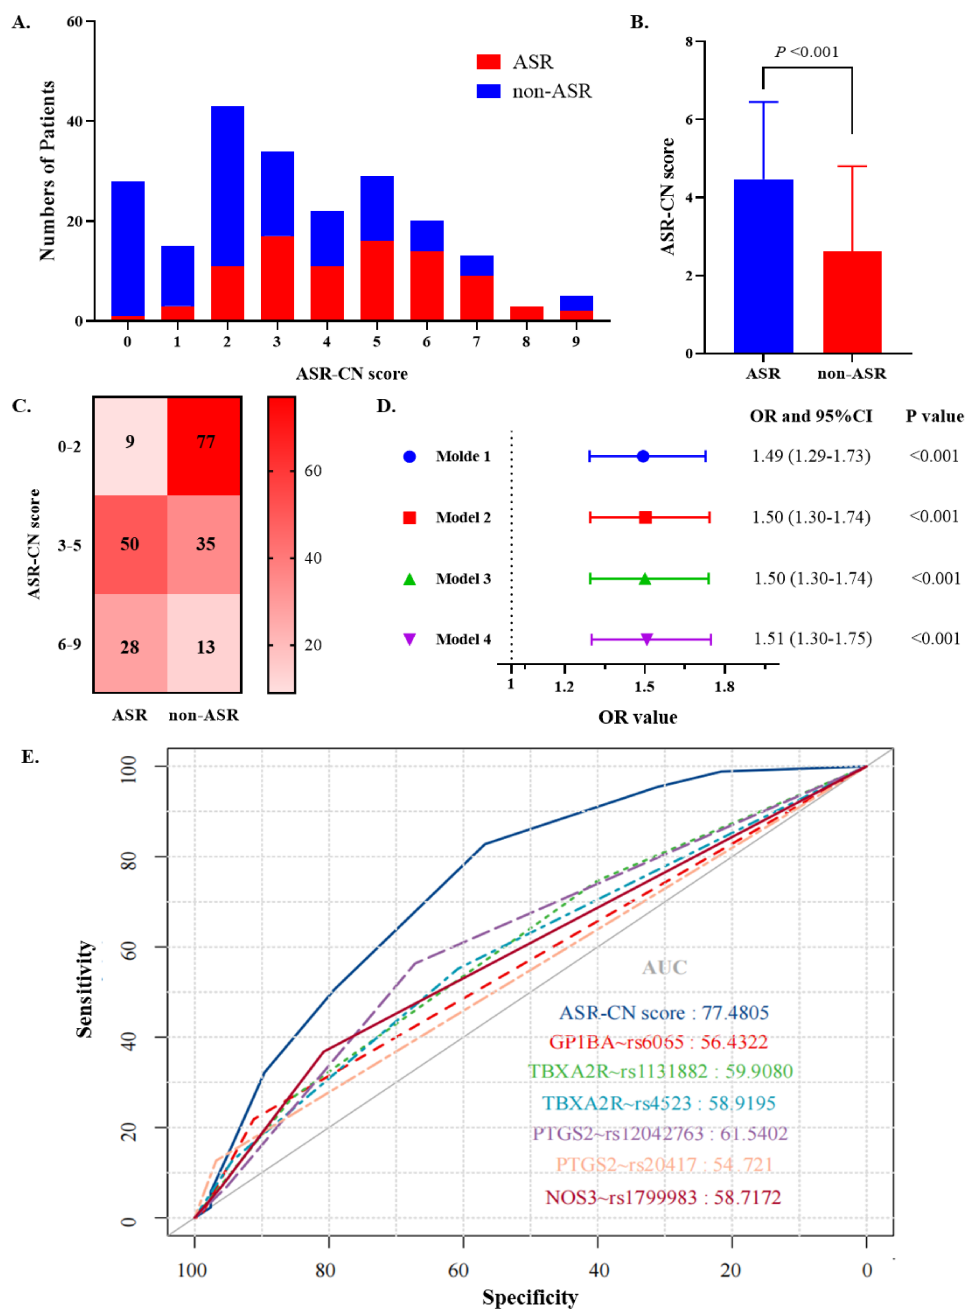

**Supplemental figure 2. The accuracy of ASR-CN score to discriminate the ASR patients within the derivation cohort.**

- A. The distribution of ASR patients in each ASR-CN score.
- B. The histogram presents that the ASR patients had a higher ASR-CN score comparing with non-ASR patients.
- C. The confusion matrix presents the number and percentage of ASR in each ASR-CN

- score interval. The patients with higher ASR-CN score are more likely to have ASR.
- D. The forest plot presents the result of logistic analysis of ASR-CN score for ASR. Model 1 was the crude result. Model 2 was the result adjusted by age and gender. Model 3 was the result adjusted by dyslipidemia and diabetes mellitus. Model 4 was the result adjusted by platelet count, APTT, PT, and fibrinogen.
- E. The accuracy of ASR-CN score and genetic types of *GP1BA*, *TBXA2R*, *PTGS2* and *NOS3* to discriminate ASR patients from non-ASR patients.
- ASR, aspirin resistance; APTT, activated partial thromboplastin time; PT, prothrombin time.

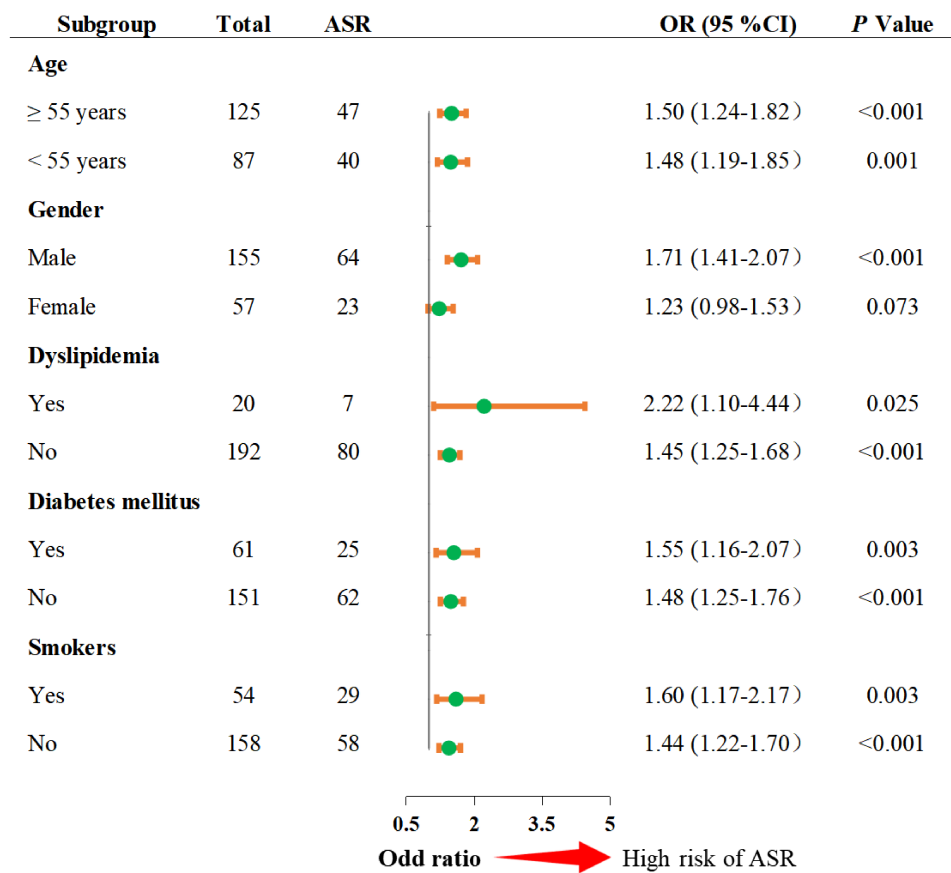

**Supplemental figure 3. Subgroup analysis of ASR-CN score for ASR within the derivation cohort.**



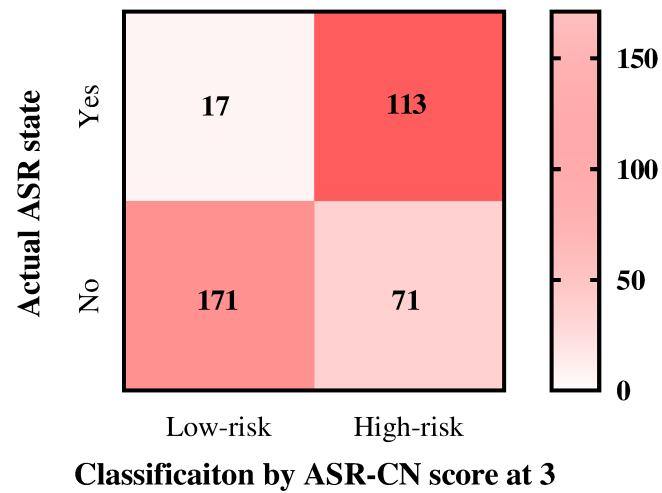

**Supplemental figure 4. The performance of ASR-CN score in classifying ASR and non-ASR patients within the validation cohort.**

ASR, aspirin resistance.

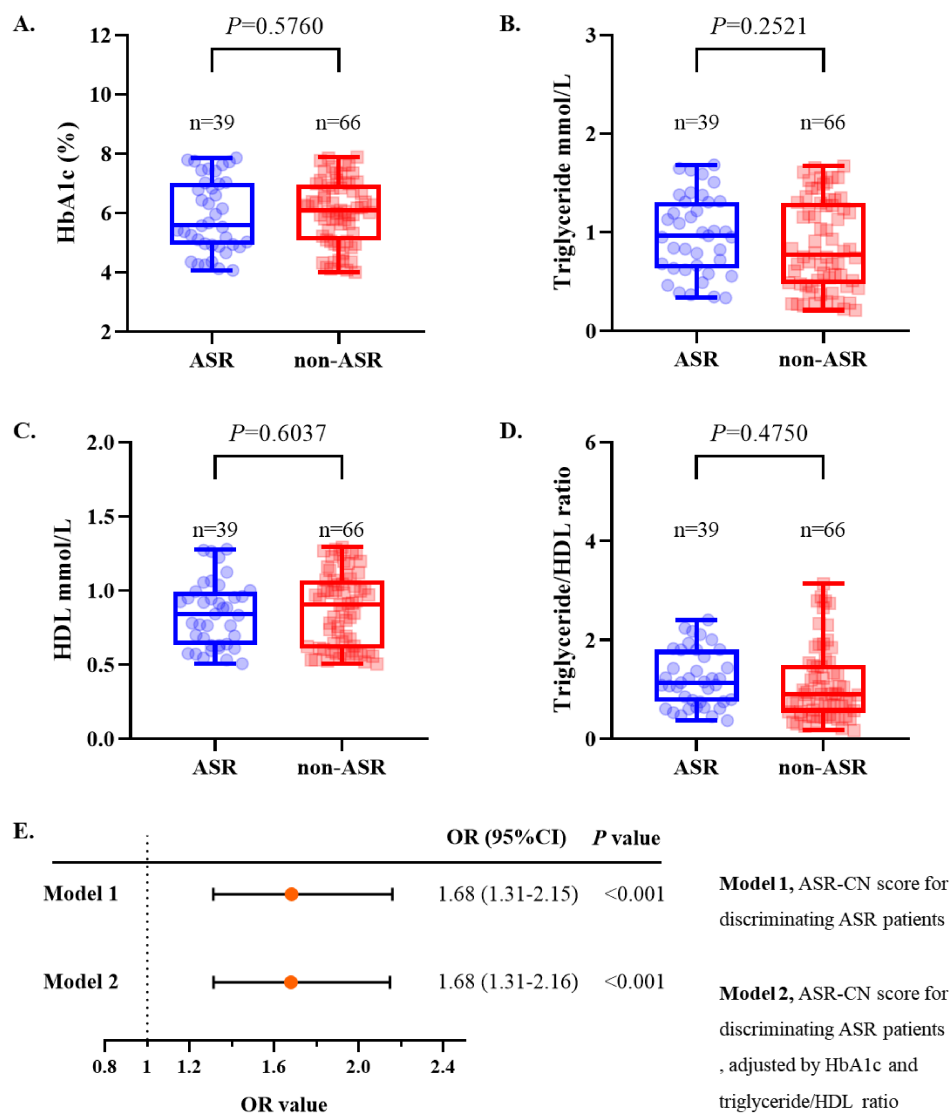

**Supplemental figure 5. Subgroup analysis of ASR-CN score for discriminating the ASR based on the patients with diabetes mellitus within the validation cohort.**

- A. The histogram presents the difference of HbA1c level between ASR patients and non-ASR patients.
- B. The histogram presents the difference of triglyceride level between ASR patients and non-ASR patients.
- C. The histogram presents the difference of HDL level between ASR patients and non-ASR patients.
- D. The histogram presents the difference of triglyceride/HDL ratio between ASR

patients and non-ASR patients.

- E. The forest plot presents the result of logistic analysis of ASR-CN score for the risk of 30-day ischemic events. Model 1 was ASR-CN score only for discriminating ASR patients. Model 2 was ASR-CN score for discriminating ASR patients, adjusted by HbA1c and triglyceride/HDL ratio.

ASR, aspirin resistance; HbA1c, glycosylated hemoglobin; HDL, high density lipoprotein.

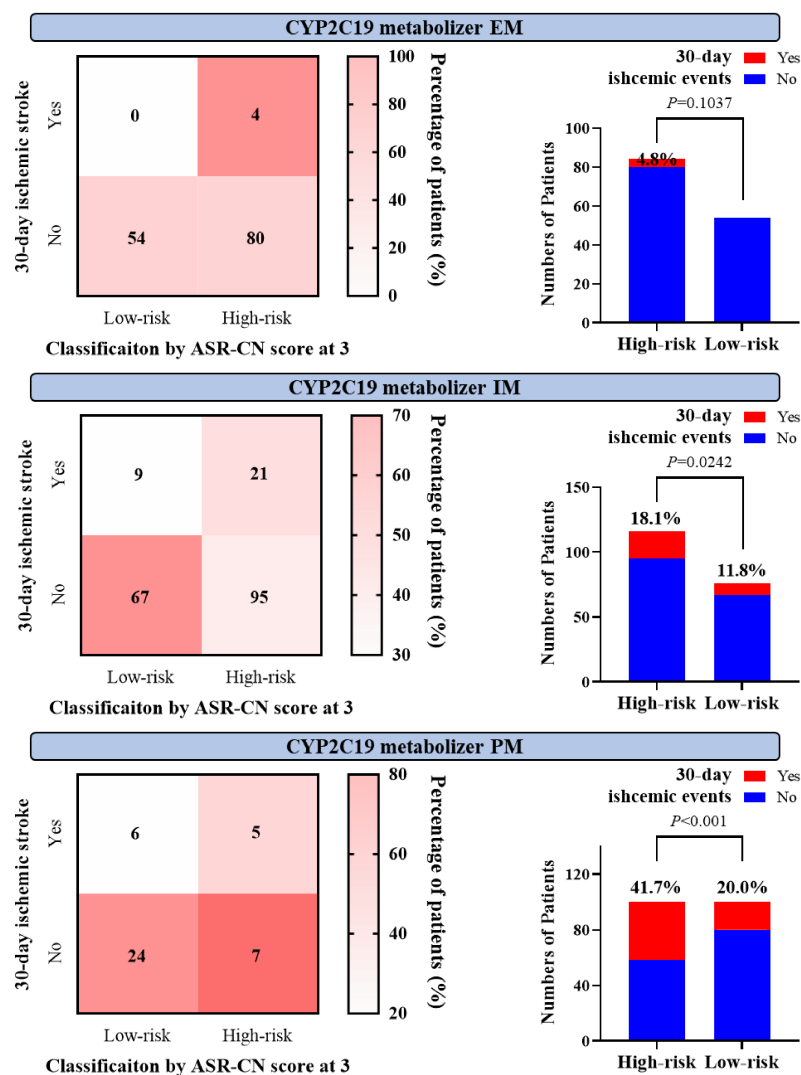

**Supplemental figure 6. Subgroup analysis of ASR-CN score for evaluating the risk of 30-day ischemic events based on the CYP2C19 metabolizer within the validation cohort.**

Subgroup analysis based on difference CYP2C19 metabolizer within the validation cohort. For EM metabolizers, no difference was found in the percentage of ischemic events between high-risk patients (ASR-CN score  $\geq 3$ ) and low-risk patients (ASR-CN score  $< 3$ ). For IM and PM metabolizers, the high-risk patients had a higher percentage of ischemic events compared with low-risk patients.

EM, extensive metabolizer; IM, intermediate metabolizer; PM, poor metabolizer.
